# Supplementary material for: Three photochromic materials based on POMs and viologens for UV probing, visual detection of metal ions and amine detection
Source: Royal Society of Chemistry journal article supplement (doi:10.1039/d2ce01244h), 2022-01-01
Supplement: d2ce01244h1.pdf [file d2ce01244h1.pdf]

Supplementary Material (ESI) for *CrystEngComm*  
This journal is © The Royal Society of Chemistry

## Three Photochromic Materials based on POMs and Viologens for UV Probing, Visual Detection of Metal Ions and Amine Detecting

Xi Xu, Mengle Yang\*, Qinghai Lu, Shuang Yu, Shufang Ma, Aixiang Tian, Jun Ying\*

Table S1. Selected bond lengths (Å) and angles (°) of compounds 1–3.

### Compound 1

|                                    |           |                                   |           |
|------------------------------------|-----------|-----------------------------------|-----------|
| Cu(1) – Cl(1)                      | 2.290(5)  | Cu(1) – N(4)                      | 2.016(13) |
| Cu(1) – Cl(1) <sup>1</sup>         | 2.660(4)  | Cu(1) – N(7)                      | 2.031(13) |
| Cl(1) – Cu(1) – Cl(1) <sup>1</sup> | 88.38(15) | N(4) – Cu(1) – N(1)               | 87.2(5)   |
| N(4) – Cu(1) – Cl(1)               | 175.5(4)  | N(4) – Cu(1) – N(7)               | 92.8(5)   |
| N(4) – Cu(1) – Cl(1) <sup>1</sup>  | 95.3(4)   | N(7) – Cu(1) – Cl(1) <sup>1</sup> | 97.3(4)   |

Symmetry codes: #1 1-X, 1-Y, 1-Z #2 1-X, 2-Y, 1-Z #3 1-X, 3-Y, -Z #4 2-X, 1-Y, 1-Z

### Compound 2

|                       |            |                      |           |
|-----------------------|------------|----------------------|-----------|
| Mo(4) – Mo(1)         | 3.2052(7)  | C(3) – C(6)          | 1.482(8)  |
| Mo(4) – O(3)          | 1.687(4)   | N(1) – C(1)          | 1.314(10) |
| Mo(3) – Mo(4) – Mo(1) | 90.199(18) | C(8) – N(2) – C(10)  | 120.1(6)  |
| O(3) – Mo(4) – O(13)  | 100.83(18) | C(10) – N(2) – C(11) | 119.5(6)  |
| O(8) – Mo(3) – Mo(4)  | 133.93(17) | C(4) – C(3) – C(2)   | 117.8(6)  |

Symmetry codes: #1 -X, -Y, 1-Z

### Compound 3

|                        |            |                      |            |
|------------------------|------------|----------------------|------------|
| Mo(11) – O(33)         | 1.790(6)   | N(5) – C(42)         | 1.303(12)  |
| Mo(2) – O(22)          | 2.129(6)   | C(10) – C(11)        | 1.504(14)  |
| O(35) – Mo(11) – O(33) | 109.0(3)   | N(5) – C(41) – C(40) | 120.2(9)   |
| O(2) – Mo(5) – Mo(8)   | 124.65(17) | C(7) – C(10) – C(9)  | 118.2(11)  |
| O(17) – Mo(1) – O(15)  | 145.5(2)   | N(1) – C(19) – C(18) | 117.9 (12) |

Symmetry codes: #1 -X, 3-Y, 3-Z #2 1-X, 3-Y, 4-Z #3 -X, 2-Y, 2-Z

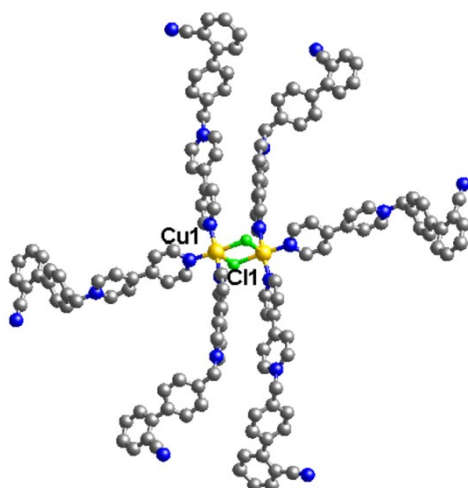

**Fig. S1.** The bi-nuclear Cu cluster constructed by six Cbybpy ligands of compound **1**.

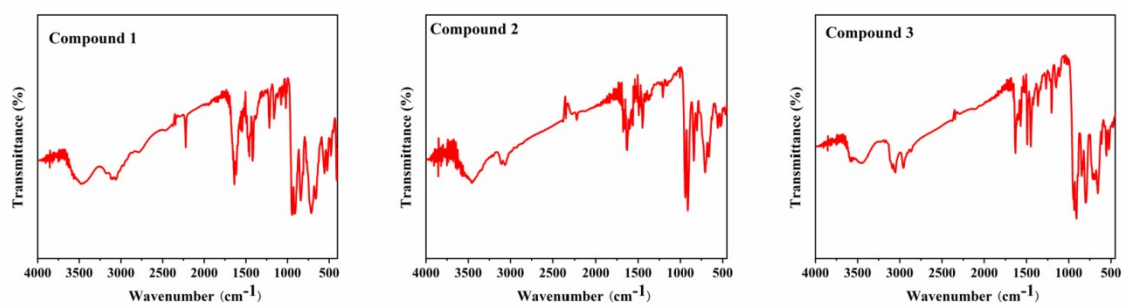

**Fig. S2.** The IR spectra of compounds **1–3**.

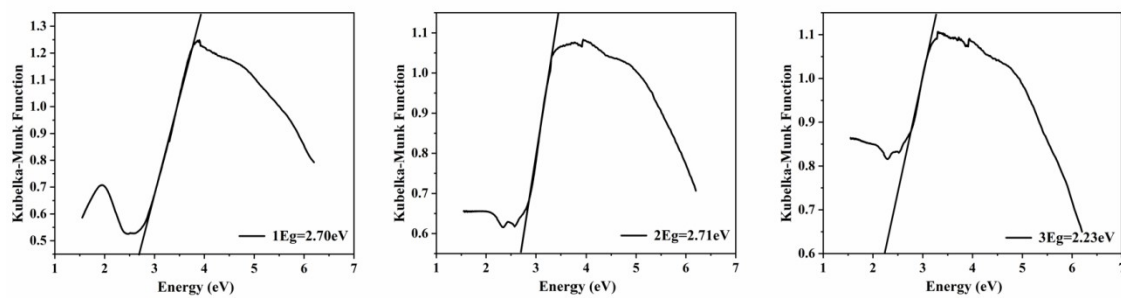

**Fig. S3.** The solid-state optical diffuse-reflectance spectra of compounds **1–3**.

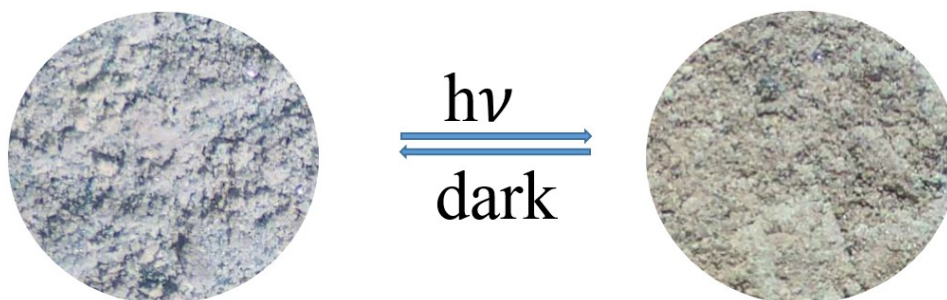

**Fig. S4.** Color change of compound **1** before and after photochromism.

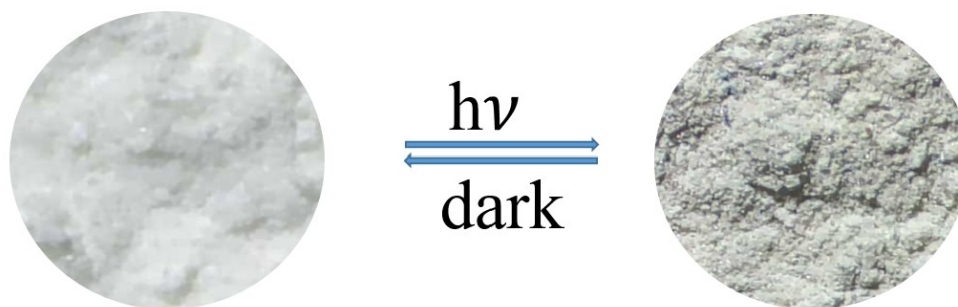

Fig. S5. Color change of compound 2 before and after photochromism.

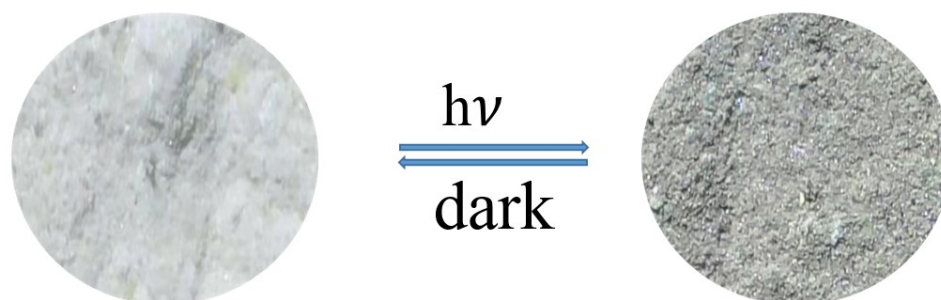

Fig. S6. Color change of compound 3 before and after photochromism.

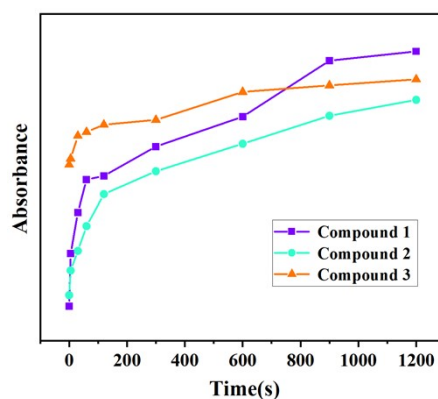

Fig. S7. The plots of absorption changes at 475 nm for 1, 505 nm for 2, 514 nm for 3 with irradiation time vs. UV irradiance.

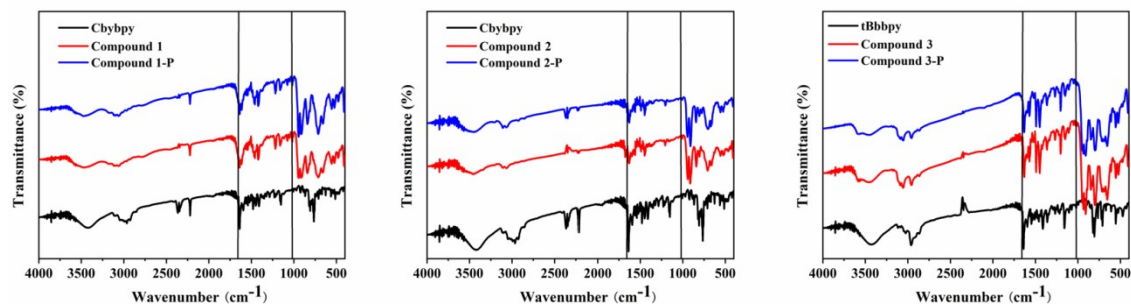

Fig. S8. The IR spectra of Cbybpy, tBbby, compounds 1–3 (before irradiation) and compounds 1-P, 2-P, 3-P (after irradiation).

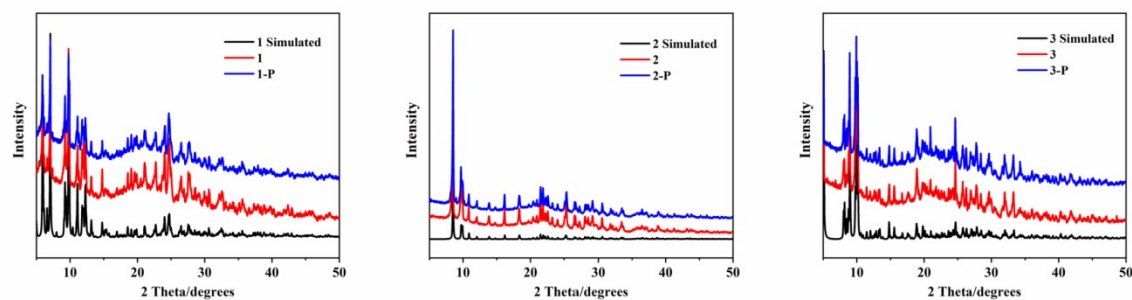

**Fig. S9.** The simulated and experimental PXRD patterns of **1–3** (before irradiation) and **1-P**, **2-P**, **3-P** (after irradiation).

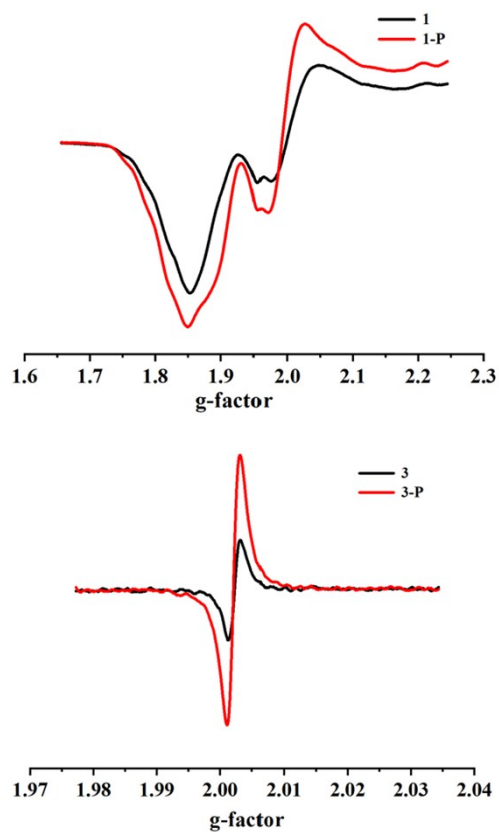

**Fig. S10.** EPR spectra of **1**, **3** and **1-P**, **3-P** (before and after irradiation).

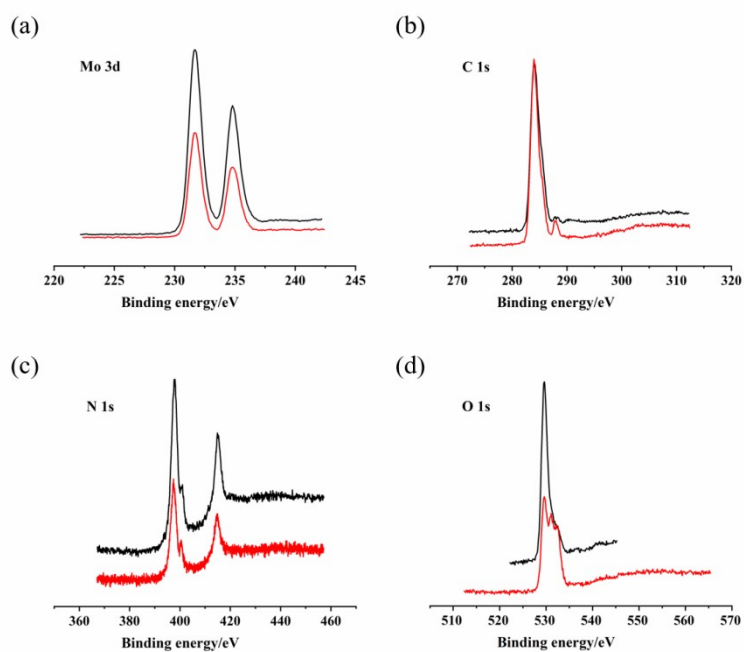

Fig. S11. XPS core-level spectra before (black line) and after (red line) irradiation of 1.

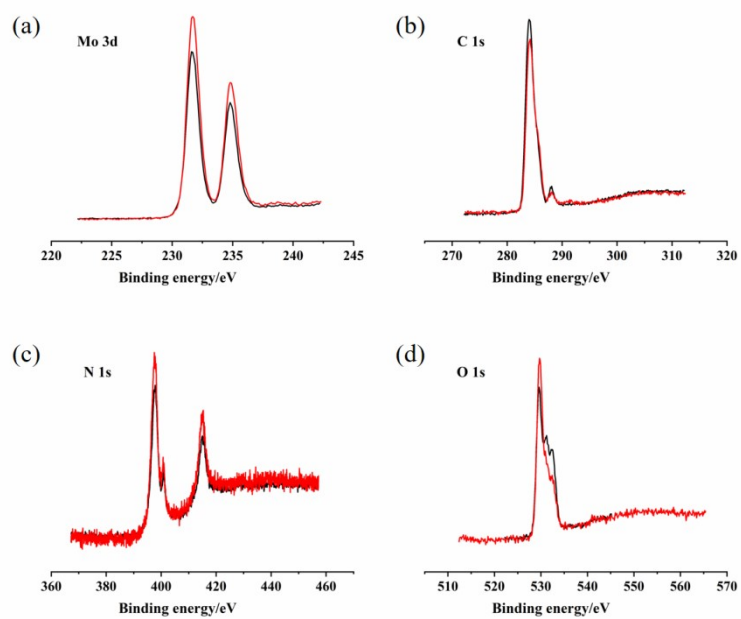

Fig. S12. XPS core-level spectra before (black line) and after (red line) irradiation of 2.

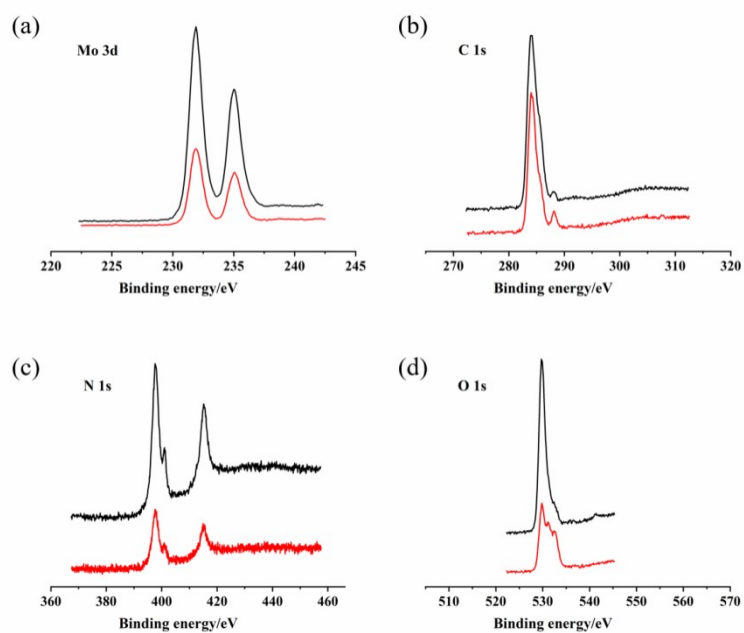

Fig. S13. XPS core-level spectra before (black line) and after (red line) irradiation of 3.

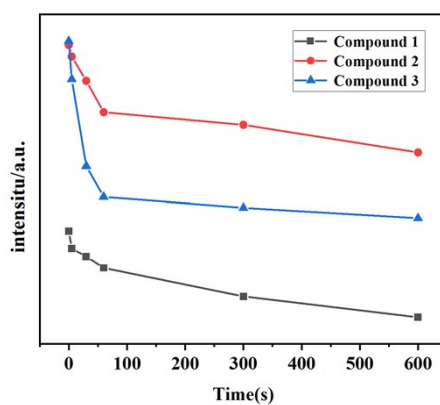

Fig. S14. The plots of fluorescence intensity changes at 400 nm for 1, 397 nm for 2, 398 nm for 3 with irradiation time vs. UV irradiance.

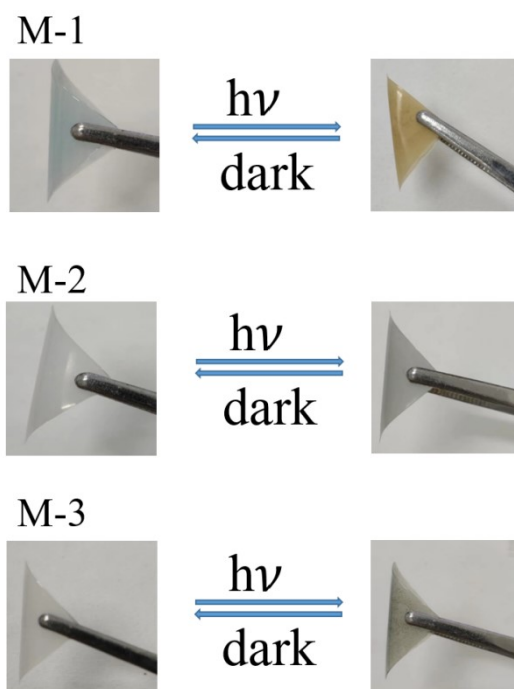

Fig. S15. Flexibility of M-1, M-2 and M-3 (before and after irradiation).

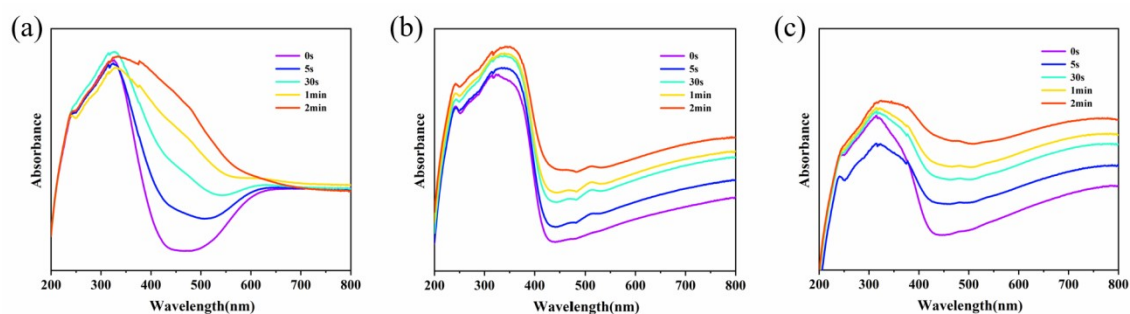

Fig. S16. UV-vis spectral changes of M-1, M-2 and M-3 (a-c) in the solid state upon UV (200–400 nm) and visible-light illumination (>400 nm) at room temperature in air.

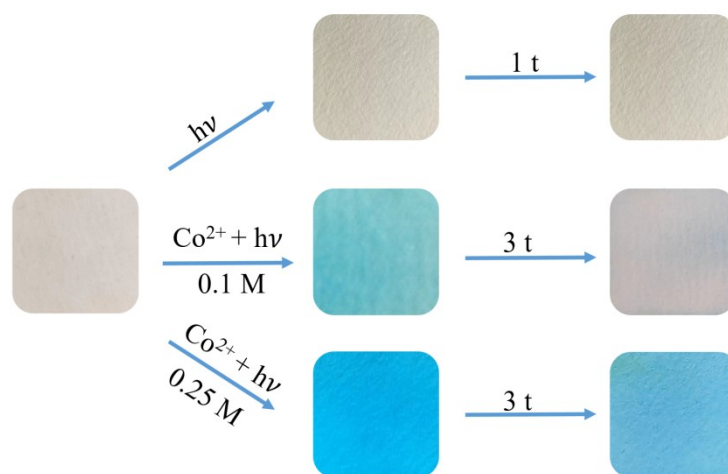

Fig. S17. Color change for visual detection of  $\text{Co}^{2+}$  by Z-2 (before and after irradiation).

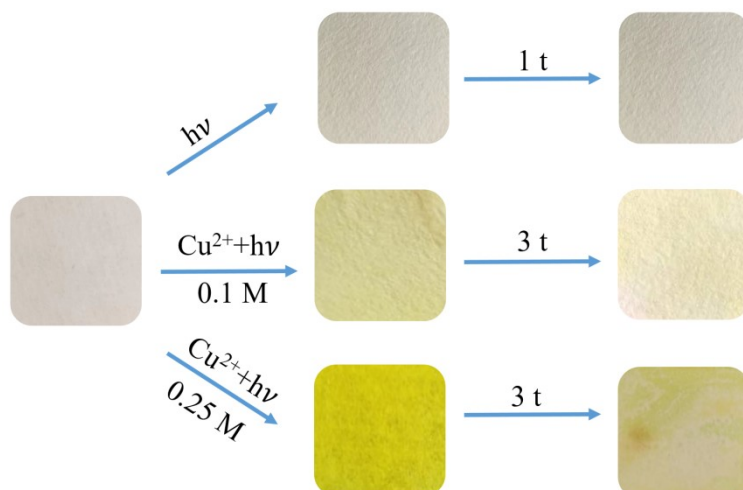

**Fig. S18.** Color change for visual detection of Cu<sup>2+</sup> by Z-2 (before and after irradiation).

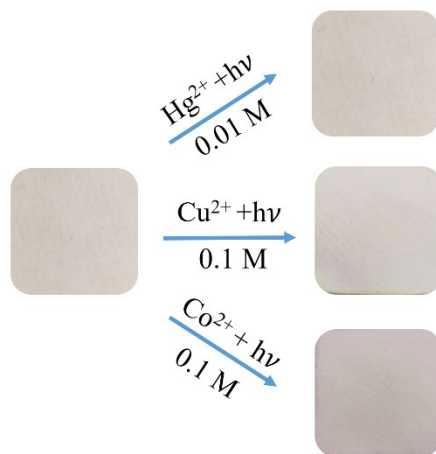

**Fig. S19.** Blank test paper immersed in solutions containing different ions and irradiated with color changes.

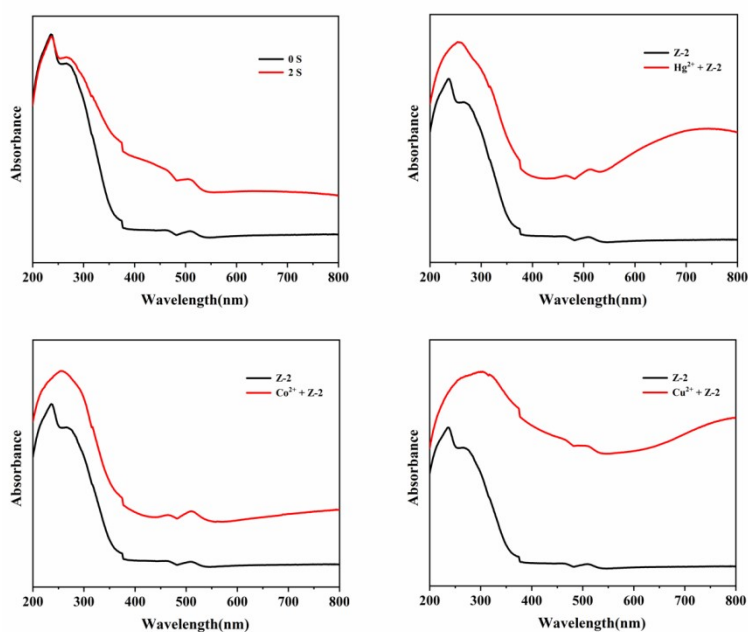



**Fig. S20.** UV-vis spectral changes of Z-2, Z-2(Hg<sup>2+</sup>), Z-2(Co<sup>2+</sup>) and Z-2(Cu<sup>2+</sup>) in the solid state upon UV (200–400 nm) and visible-light illumination (>400 nm) at room temperature in air.

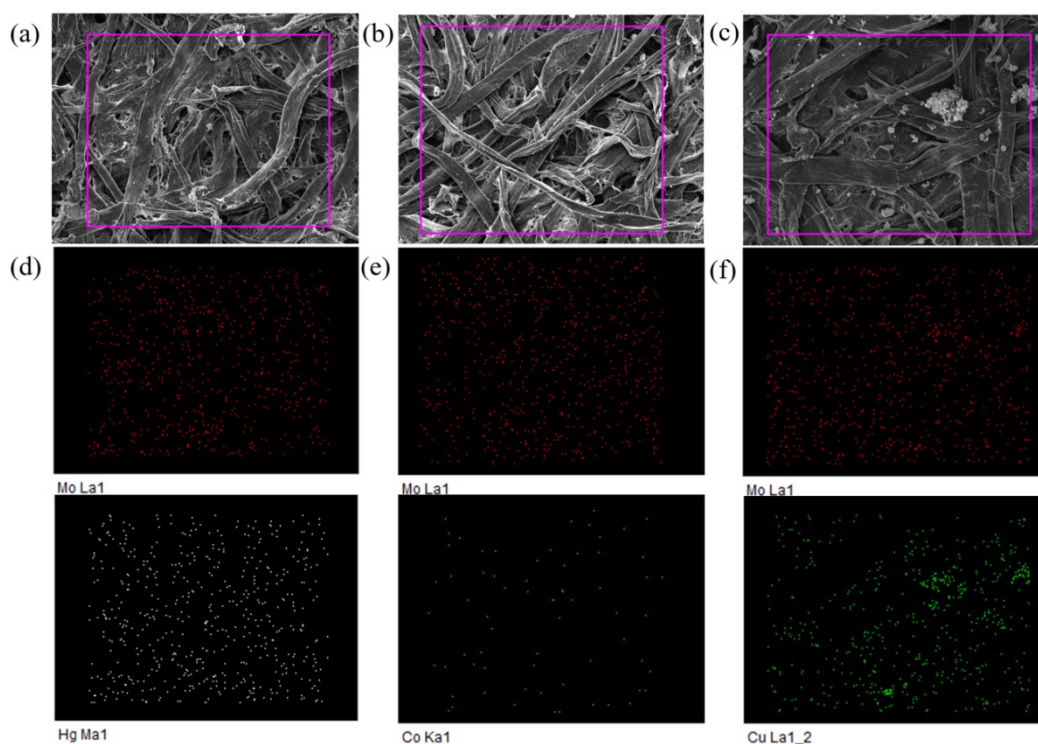

**Fig. S21.** (a-c) Morphology and structures of Z-2(Hg<sup>2+</sup>), Z-2(Co<sup>2+</sup>) and Z-2(Cu<sup>2+</sup>) characterized by SEM. (d-f) EDS elemental mapping images of Z-2(Hg<sup>2+</sup>), Z-2(Co<sup>2+</sup>) and Z-2(Cu<sup>2+</sup>).

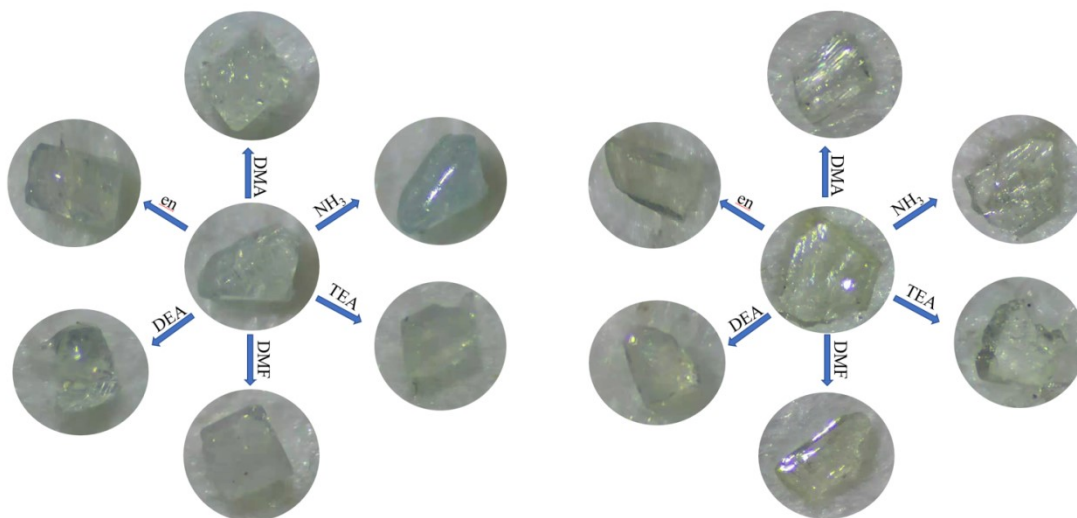

**Fig. S22.** Color change of 2 and 3 before and after detection of organic amine.

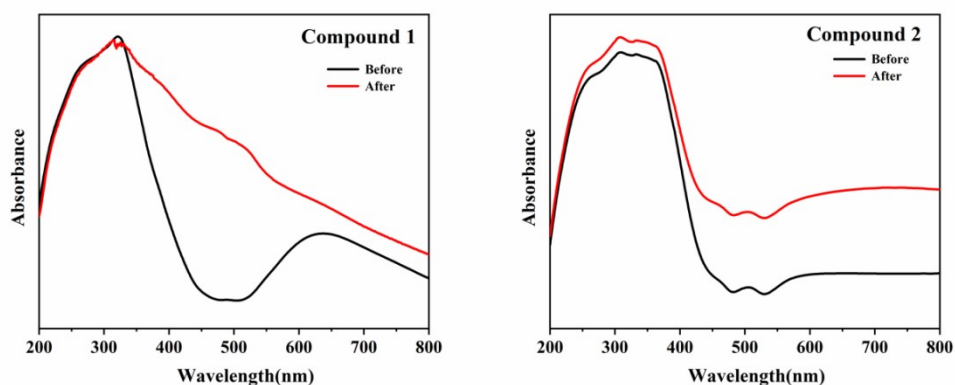

Fig. S23. UV/vis spectra of compounds **1** and **2** before and after exposure to  $\text{NH}_3$  vapors.

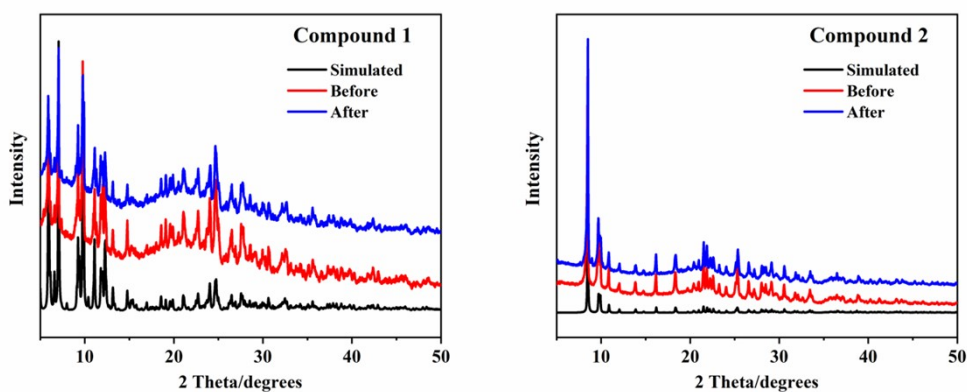

Fig. S24. The simulated and experimental PXRD patterns of **1** and **2** (before and after ammonia detection).

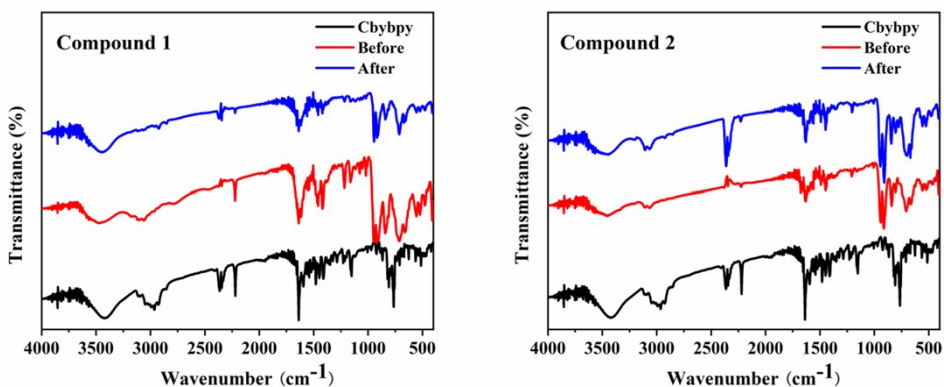

Fig. S25. The IR spectra of Cbybpy, compounds **1** and **2** (after ammonia detection).
